# Supplementary material for: Reporting trends of randomised controlled trials in heart failure with preserved ejection fraction: a systematic review
Source: PubMed Central journal article supplement — Open Heart. 2016 Aug 1;3(2):e000449. doi: 10.1136/openhrt-2016-000449 (PMC4975871; doi:10.1136/openhrt-2016-000449), 2016-08-01
Supplement: openhrt-2016-000449supp.pdf [file openhrt-2016-000449supp.pdf]

## Supplementary Material

### Supplemental material table 1: Search Strategy

| Medline                                                                      | EMBASE                                    | Cochrane CENTRAL                      |
|------------------------------------------------------------------------------|-------------------------------------------|---------------------------------------|
| 1. Heart failure                                                             | 1. Heart failure                          | In "Trials"                           |
| 2. Normal ejection fraction                                                  | 2. Normal ejection fraction               | 1. heart failure                      |
| 3. Preserved cardiac function                                                | 3. Preserved cardiac function             | 2. preserved ejection fraction        |
| 4. Preserved ejection fraction                                               | 4. Preserved ejection fraction            | 3. preserved cardiac function         |
| 5. 1 and 2                                                                   | 5. 1 and 2                                | 4. normal ejection fraction           |
| 6. 1 and 3                                                                   | 6. 1 and 3                                | 5. 1 and 2                            |
| 7. 1 and 4                                                                   | 7. 1 and 4                                | 6. 1 and 3                            |
| 8. Diastolic heart failure                                                   | 8. Diastolic heart failure                | 7. 1 and 4                            |
| 9. Diastolic dysfunction                                                     | 9. Diastolic dysfunction                  | 8. "diastolic heart failure"          |
| 10. HFPEF                                                                    | 10. HFPEF                                 | 9. "diastolic dysfunction"            |
| 11. HFNEF                                                                    | 11. HFNEF                                 | 10. "HFNEF"                           |
| 12. Or/5-11                                                                  | 12. Or/5-11                               | 11. "HFPEF"                           |
| 13. Randomized Controlled Trials as Topic/                                   | 13. Clinical trial/                       | 12. 5 or 6 or 7 or 8 or 9 or 10 or 11 |
| 14. Randomized controlled trial/                                             | 14. Randomized controlled trial/          |                                       |
| 15. Random Allocation/                                                       | 15. Randomization/                        |                                       |
| 16. Double Blind Method/                                                     | 16. Single blind procedure/               |                                       |
| 17. Single Blind Method/                                                     | 17. Double blind procedure/               |                                       |
| 18. Clinical trial/                                                          | 18. Crossover procedure/                  |                                       |
| 19. Clinical trial, phase i.pt                                               | 19. Placebo/                              |                                       |
| 20. Clinical trial, phase ii.pt                                              | 20. Randomized controlled trial.tw.       |                                       |
| 21. Clinical trial, phase iii.pt                                             | 21. Rct.tw.                               |                                       |
| 22. Clinical trial, phase iv.pt                                              | 22. Random allocation.tw.                 |                                       |
| 23. Controlled clinical trial.pt                                             | 23. Randomly allocated.tw.                |                                       |
| 24. Randomized controlled trial.pt                                           | 24. Allocated randomly.tw.                |                                       |
| 25. Multicenter study.pt                                                     | 25. (allocated adj2 random).tw.           |                                       |
| 26. Clinical trial.pt                                                        | 26. Single blind\$.tw.                    |                                       |
| 27. Exp Clinical Trials as topic/                                            | 27. Double blind\$.tw.                    |                                       |
| 28. Or/13-27                                                                 | 28. ((treble or triple) adj (blind\$).tw. |                                       |
| 29. (clinical adj trial\$.tw                                                 | 29. Placebo\$.tw.                         |                                       |
| 30. ((singl\$ or doubl\$ or treb\$ or tripl\$) adj (blind\$3 or mask\$3)).tw | 30. Prospective study/                    |                                       |
|                                                                              | 31. Or/13-30                              |                                       |
|                                                                              | 32. Case study/                           |                                       |
|                                                                              | 33. Case report.tw.                       |                                       |

- |                                 |                                 |
|---------------------------------|---------------------------------|
| 31. Placebos/                   | 34. Abstract report/ or letter/ |
| 32. Placebo\$.tw                | 35. Or/32-34                    |
| 33. Randomly allocated.tw       | 36. 31 not 35                   |
| 34. (allocated adj2 random\$.tw | 37. 12 and 36                   |
| 35. Or/29-34                    |                                 |
| 36. 28 or 35                    |                                 |
| 37. Case report.tw              |                                 |
| 38. Letter/                     |                                 |
| 39. Historical article/         |                                 |
| 40. Or/37-39                    |                                 |
| 41. 36 not 40                   |                                 |
| 42. 12 and 41                   |                                 |

## Supplemental material table 2: Summary of included studies

| Author, Year                | HFPEF definition                 | LVEF (%) | Sample size                | Treatment and follow-up | Key outcomes                                                                                                                                                            |
|-----------------------------|----------------------------------|----------|----------------------------|-------------------------|-------------------------------------------------------------------------------------------------------------------------------------------------------------------------|
| Aronow 1997 <sup>1</sup>    | NYHA II-IV                       | 40       | Propranolol (n=79)         | 32 months               | Significant decrease in total mortality plus non-fatal MI with propranolol (59% vs 82%, RRR 37%, p=0.002)                                                               |
|                             | Clinical HF                      |          | No propranolol (n=79)      |                         | Significant increase in LVEF (p<0.0001) with propranolol vs. no propranolol                                                                                             |
|                             | Prior Q wave infarct             |          |                            |                         |                                                                                                                                                                         |
| Warner 1999 <sup>2</sup>    | Diastolic dysfunction            | 50       | Losartan (n=20)            | 2 weeks                 | Significant increase in exercise time with losartan (12.3 vs 11.0, P<0.05)                                                                                              |
|                             | Peak SBP>200mmHg during exercise |          | Placebo (n=20)             |                         | Significant difference in QOL with losartan (MLHF score 18 vs. 22, p<0.05)                                                                                              |
| Nodari 2003 <sup>3</sup>    | NYHA II-III                      | 50       | Atenolol (n=13)            | 6 months                | NS change on clinical status, exercise capacity or echo parameters                                                                                                      |
|                             | Diastolic dysfunction on echo    |          | Nebivolol (n=13)           |                         | Significant change to some haemodynamic parameters with either                                                                                                          |
| Yusuf 2003 <sup>4</sup>     | NYHA II-IV                       | 40       | Candesartan (n=1514)       | 36.6 months             | NS difference primary outcome (CV mortality, hospitalization) (HR 0.89, P=0.118)                                                                                        |
|                             |                                  |          | Placebo (n=1509)           |                         | Significant reduction HF hospitalization with candesartan (p=0.017), NS difference CV death                                                                             |
| Mottram 2004 <sup>5</sup>   | Hypertension                     | 50       | Spirinolactone (n=15)      | 6 months                | NS change in exercise capacity                                                                                                                                          |
|                             | NYHA II                          |          | Placebo (n=15)             |                         |                                                                                                                                                                         |
|                             | Diastolic dysfunction            |          |                            |                         |                                                                                                                                                                         |
| Zi 2003 <sup>6</sup>        | NYHA II-III                      | 40       | Quinapril (n=36)           | 6 months                | NS difference in mean 6MWD (p=0.63), QOL scores (p=0.84) or NYHA class (p>0.05)                                                                                         |
|                             |                                  |          | Placebo (n=38)             |                         | NS decrease in likelihood of worsening HF (p=0.12) or hospitalisation (p=0.43)                                                                                          |
| Bergstrom 2004 <sup>7</sup> | Clinical HF                      | 45       | Carvedilol (n=47)          | 6 months                | Significant improvement in E/A (p<0.05)                                                                                                                                 |
|                             | Diastolic dysfunction            |          | Placebo (n=50)             |                         |                                                                                                                                                                         |
| Little 2004 <sup>8</sup>    | NYHA II-IV                       | 50       | Candesartan (n=21)         | 2 weeks                 | Significant increase exercise time and QOL (p<0.05) with candesartan vs baseline                                                                                        |
|                             | Diastolic dysfunction            |          | Verapamil (n=21)           |                         | NS improvement in exercise or QOL with verapamil                                                                                                                        |
| Takeda 2004 <sup>9</sup>    | NYHA II-III                      | 45       | Carvedilol (n=19)          | 12 months               | Significant improvement of all endpoints with carvedilol: BNP (175 to 106pg/ml, p<0.01), NYHA 2.37 to 1.56 (p<0.01), Specific Activity Scale (4.75 to 5.68METs, p<0.02) |
|                             |                                  |          | No carvedilol (n=21)       |                         |                                                                                                                                                                         |
| Kasama 2005 <sup>10</sup>   | Non-ischemic HF                  | 40       | Candesartan (n=25)         | 6 months                | Significant improvement NYHA with candesartan (p<0.05 vs placebo)                                                                                                       |
|                             |                                  |          | Placebo (n=25)             |                         | Significant decrease in LVEDV and increase in LVEF (p<0.05)                                                                                                             |
| Ahmed 2006 <sup>11</sup>    | Clinical HF                      | 45       | Digoxin (n=492)            | 37 months               | NS reduction primary outcome (HF hospitalization, HF mortality) (HR 0.82, p=0.136).                                                                                     |
|                             |                                  |          | Placebo (n=496)            |                         | NS reduction in HF hospitalisation (HR 0.79, p=0.094)                                                                                                                   |
| Cleland 2006 <sup>12</sup>  | Clinical HF                      | 40       | Perindopril (n=424)        | 2.1 years               | NS reduction in primary outcome (all-cause mortality, HF hospitalisation) after follow-up (HR 0.92, p=0.55)                                                             |
|                             | Diastolic dysfunction            |          | Placebo (n=426)            |                         | NS reduction in primary outcome at 12 months (HR 0.69, p=0.055), but significant reduction hospitalization (HR 0.63, p=0.033), greater 6MWD (p=0.011), NS change BNP    |
| Little 2006 <sup>13</sup>   | Diastolic dysfunction            | 50       | Losartan (n=19)            | 6 months                | Significant improvement exercise time and QOL (p<0.05) with losartan                                                                                                    |
|                             |                                  |          | Hydrochlorothiazide (n=21) |                         | NS change exercise time (p=0.32) or QOL (p=0.43) with hydrochlorothiazide                                                                                               |

|                                     |                                                                 |    |                                                                                |             |                                                                                                                                                                                                                                                                                                     |
|-------------------------------------|-----------------------------------------------------------------|----|--------------------------------------------------------------------------------|-------------|-----------------------------------------------------------------------------------------------------------------------------------------------------------------------------------------------------------------------------------------------------------------------------------------------------|
| Massie 2008 <sup>14</sup>           | NYHA II-IV<br>Clinical HF                                       | 45 | Irbesartan (n=2067)<br>Placebo (n=2061)                                        | 49.5 months | NS effect on primary outcome (CV hospitalization, all-cause mortality) (HR 0.95, p=0.35). NS difference in other pre-specified outcomes (HF mortality or hospitalization, all-cause and CV mortality, and QOL)                                                                                      |
| Yip 2008 <sup>15</sup>              | NYHA II-IV<br>Clinical HF                                       | 45 | Diuretic only (n=50)<br>Diuretic+Irbesartan (n=56)<br>Diuretic+Ramipril (n=45) | 12 months   | Diuretics significantly improved symptoms and neither irbesartan nor ramipril had a significant additional effect.<br>Diuretics in combination with irbesartan or ramipril marginally improved LV systolic and diastolic longitudinal LV function, and lowered NT-proBNP.                           |
| Mak 2009 <sup>16</sup>              | Clinical features HF<br>Diastolic dysfunction                   | 45 | Eplerenone 25-50mg (24)<br>No eplerenone (n=20)                                | 12 months   | Eplerenone prevents a progressive increase in pro-collagen type-III aminoterminal peptide<br>NS between group effect on diastolic function, QOL or BNP                                                                                                                                              |
| Parthasarathy 2009 <sup>17</sup>    | Clinical HF<br>Diastolic dysfunction                            | 40 | Valsartan (n= 70)<br>Placebo (n= 82)                                           | 14 weeks    | Valsartan had no significant effect on exercise time, gas exchange, 6MWD , exertion-related symptoms, BNP levels, echo parameters, or QOL<br>Valsartan significantly lowered peak exercise systolic BP vs. placebo (P < 0.001) and improved ratings of perceived exertion (Borg score) (P = 0.008). |
| Kitzman 2010 <sup>18</sup>          | Clinical HF                                                     | 50 | Placebo (n=36)<br>Enalapril (n=35)                                             | 12 months   | Enalapril did not improve exercise capacity<br>NS improvement in QOL with enalapril (p=0.07)                                                                                                                                                                                                        |
| Orozco-Gutierrez 2010 <sup>19</sup> | NYHA I-III<br>Diastolic dysfunction                             | 45 | L-arginine (n=15)<br>Citrulline (n=15)                                         | 2 months    | Significant improvement in pulmonary artery pressure (p<0.05 in both) and treadmill duration (p<0.05 in both)                                                                                                                                                                                       |
| Deswal 2011 <sup>20</sup>           | NYHA II-III<br>Diastolic dysfunction                            | 50 | Eplerenone 50mg (n=21)<br>Placebo (n=23)                                       | 6 months    | Significant improvement in 6MWD vs. baseline in both groups, but NS difference between groups (p=0.91)<br>NS between group difference in QOL, NYHA class or SBP<br>Significant reduction in markers of collagen turnover and improvement in diastolic function                                      |
| Conraads 2012 <sup>21</sup>         | NYHA II-III<br>Diastolic dysfunction                            | 45 | Nebivolol (n = 57)<br>Placebo (n = 59)                                         | 6 months    | Nebivolol did not improve exercise capacity in patients with HFPEF (actually decreased compared to placebo.)<br>NS difference in QOL improvement vs placebo                                                                                                                                         |
| Solomon 2012 <sup>22</sup>          | NYHA II-III<br>Raised serum biomarkers                          | 45 | LCZ696 (n=149)<br>Valsartan (n=152)                                            | 12 weeks    | Greater reduction NT-proBNP with LCZ696 at 12 weeks (P=0.005), NS at 36 weeks (p=0.20)<br>NS difference in NYHA class at 12 weeks (p=0.11), but improvement in LCZ696 group at 36 weeks (p=0.05).<br>NS difference in clinical composite assessment or QOL.                                         |
| Cocco 2013 <sup>23</sup>            | NYHA III<br>Diastolic dysfunction                               | 50 | Ivabradine (n=21)<br>Digoxin (n=21)                                            | 3 months    | Significant improvement in NYHA, BNP and 6MWD for both treatments (p<0.0001)                                                                                                                                                                                                                        |
| Edelman 2013 <sup>24</sup>          | NYHA II-III<br>Diastolic dysfunction                            | 50 | Spironolactone (n=213)<br>Placebo (n=209)                                      | 12 months   | Improved diastolic dysfunction<br>NS improvement symptoms, QOL, 6MWD or peak VO <sub>2</sub><br>No effect hospitalisation or mortality                                                                                                                                                              |
| Kosmala 2013 <sup>25</sup>          | ESC definition of HFPEF<br>Clinical HF<br>Diastolic dysfunction | 50 | Ivabradine (n=30)<br>Placebo (n=31)                                            | 7 days      | Significant improvement in exercise capacity (+1.5mets, p=0.001) and peak VO <sub>2</sub> (+3ml/kg/min, p=0.004) with ivabradine, with significant difference in change compared with placebo (+3 vs +0.4ml/kg/min, p=0.003)                                                                        |
| Maier <sup>26</sup>                 | Raised serum biomarkers<br>Diastolic dysfunction                | 45 | Ranolazine (n=12)<br>Placebo (n=8)                                             | 2 weeks     | NS changes in echo parameters, cardiopulmonary exercise test parameters or NT-proBNP levels                                                                                                                                                                                                         |
| Redfield 2013 <sup>27</sup>         | NYHA II-IV<br>Clinical heart failure                            | 50 | Sildenafil (n=213)<br>Placebo (n=213)                                          | 24 weeks    | NS difference in median changes in peak VO <sub>2</sub> (-0.2 vs -0.2ml/kg/min, p=0.9), mean clinical status rank score after treatment (94.2 vs 95.8, p=0.85) and 6MWD after treatment with sildenafil (5.0 vs. 15.0m, p=0.92)                                                                     |

|                                |                                   |    |                       |           |                                                                                                                                                                          |
|--------------------------------|-----------------------------------|----|-----------------------|-----------|--------------------------------------------------------------------------------------------------------------------------------------------------------------------------|
| Yamamoto 2013 <sup>28</sup>    | Modified Framingham criteria      | 40 | Carvedilol (n=120)    | 3.2 years | NS difference in primary outcomes (composite CV death, HF hospitalization) - carvedilol (29), control (34) (HR 0.902, 95% CI 0.50-1.17, p=0.69)                          |
|                                |                                   |    | No carvedilol (n=125) |           | Carvedilol dose >7.5mg showed significantly less primary outcome than control (HR 0.54, 95% CI 0.30-0.96, P=0.04)                                                        |
| Kurrelmeyer 2014 <sup>29</sup> | NYHA II-III                       | 50 | Spirolactone (n=24)   | 6 months  | Stable clinical status - significant worsening of clinical composite score with placebo only (p=0.02)                                                                    |
|                                | Diastolic dysfunction             |    | Placebo (n=24)        |           | Improvement in diastolic function – Increased lateral e' (p=0.003) and decreased E/e' (p=0.0001)                                                                         |
|                                | Raised serum biomarkers           |    |                       |           | NS change in BNP or 6MWD                                                                                                                                                 |
| Pitt 2014 <sup>30</sup>        | Clinical HF or HF hospitalisation | 45 | Spirolactone (n=1722) | 3.3 years | NS difference in primary outcome (composite CV death, aborted cardiac arrest, HF hospitalization) with spironolactone (18.6% vs 20.4%, HR 0.89 95% CI 0.77-1.04, P=0.14) |
|                                | Raised serum biomarkers           |    | Placebo (n=1723)      |           | Significantly lower incidence hospitalisation in spironolactone group (12.0% vs 14.2%, HR 0.83, CI 0.69-0.99), no effect on mortality                                    |
| Van Tassel 2014 <sup>31</sup>  | NYHA II-III                       | 50 | Anakinra (n=12)       | 2 weeks   | Significant increase in peak VO2 (+1.2ml/kg/min p=0.009)                                                                                                                 |
|                                | Diastolic dysfunction             |    | Placebo (n=12)        |           | NS difference in BNP or Duke Activity Status Index                                                                                                                       |
| Zile 2014 <sup>32</sup>        | NYHA II-III                       | 50 | Sitaxsentan (n=128)   | 24 weeks  | Significant increase in median treadmill time (90s vs 37s, p=0.03) with sitaxsentan                                                                                      |
|                                | Diastolic dysfunction             |    | Placebo (n=64)        |           | NS difference in QOL, NYHA class, death or hospitalisation                                                                                                               |
| Redfield 2015 <sup>33</sup>    | Clinical HF                       | 50 | ISMN (n=110)          | 12 weeks  | NS trend towards lower daily activity with ISMN vs placebo, significant decrease in hours active/day (-0.3h, p=0.02)                                                     |
|                                | Diastolic dysfunction             |    | Placebo (n=110)       |           | NS difference between groups for 6MWD, QOL scores, NT-proBNP levels                                                                                                      |
|                                | Raised serum biomarkers           |    |                       |           |                                                                                                                                                                          |

Footnote: HFPEF - heart failure with preserved ejection fraction, LVEF - left ventricular ejection fraction, NYHA - New York Heart Association functional classification, HF - heart failure, MI - myocardial infarction, SBP - systolic blood pressure, QOL - quality of life, MLHF - Minnesota Living with Heart Failure questionnaire, NS - no significant, CV - cardiovascular, 6MWD - 6-minute walking distance, BNP - Brain natriuretic peptide, NT-proBNP - N-terminus proBNP, LVEDV - left ventricular end diastolic volume, HR - hazard ratio, CI - confidence interval, ESC - European Society of Cardiology, ISMN - isosorbide mononitrate

## **Supplemental Material References**

1. Aronow WS, Ahn C, Kronzon I. Effect of propranolol versus no propranolol on total mortality plus nonfatal myocardial infarction in older patients with prior myocardial infarction, congestive heart failure, and left ventricular ejection fraction  $\geq$  40% treated with diuretics plus angiotensin-converting enzyme inhibitors. *Am J Cardiol.* 1997;80:207-209
2. Warner JG, Metzger DC, Kitzman DW, Wesley DJ, Little WC. Losartan improves exercise tolerance in patients with diastolic dysfunction and a hypertensive response to exercise. *J Am Coll Cardiol.* 1999;33:1567-1572
3. Nodari S, Metra M, Dei Cas L. Beta-blocker treatment of patients with diastolic heart failure and arterial hypertension. A prospective, randomized, comparison of the long-term effects of atenolol vs. Nebivolol. *Eur J Heart Fail.* 2003;5:621-627
4. Yusuf S, Pfeffer MA, Swedberg K, Granger CB, Held P, McMurray JJ, Michelson EL, Olofsson B, Ostergren J. Effects of candesartan in patients with chronic heart failure and preserved left-ventricular ejection fraction: The charm-preserved trial. *Lancet (London, England).* 2003;362:777-781
5. Mottram PM, Haluska B, Leano R, Cowley D, Stowasser M, Marwick TH. Effect of aldosterone antagonism on myocardial dysfunction in hypertensive patients with diastolic heart failure. *Circulation.* 2004;110:558-565
6. Zi M, Carmichael N, Lye M. The effect of quinapril on functional status of elderly patients with diastolic heart failure. *Cardiovascular drugs and therapy / sponsored by the International Society of Cardiovascular Pharmacotherapy.* 2003;17:133-139
7. Bergstrom A, Andersson B, Edner M, Nylander E, Persson H, Dahlstrom U. Effect of carvedilol on diastolic function in patients with diastolic heart failure and preserved systolic function. Results of the swedish doppler-echocardiographic study (swedic). *Eur J Heart Fail.* 2004;6:453-461
8. Little WC, Wesley-Farrington DJ, Hoyle J, Brucks S, Robertson S, Kitzman DW, Cheng CP. Effect of candesartan and verapamil on exercise tolerance in diastolic dysfunction. *J Cardiovasc Pharmacol.* 2004;43:288-293
9. Takeda Y, Fukutomi T, Suzuki S, Yamamoto K, Ogata M, Kondo H, Sugiura M, Shigeyama J, Itoh M. Effects of carvedilol on plasma b-type natriuretic peptide concentration and symptoms in patients with heart failure and preserved ejection fraction. *Am J Cardiol.* 2004;94:448-453
10. Kasama S, Toyama T, Kumakura H, Takayama Y, Ichikawa S, Suzuki T, Kurabayashi M. Effects of candesartan on cardiac sympathetic nerve activity in patients with congestive heart failure and preserved left ventricular ejection fraction. *J Am Coll Cardiol.* 2005;45:661-667
11. Ahmed A, Rich MW, Fleg JL, Zile MR, Young JB, Kitzman DW, Love TE, Aronow WS, Adams Jr KF, Gheorghide M. Effects of digoxin on morbidity and mortality in diastolic heart failure: The ancillary digitalis investigation group trial. *Circulation.* 2006;114:397-403
12. Cleland JG, Tendera M, Adamus J, Freemantle N, Polonski L, Taylor J, Investigators P-C. The perindopril in elderly people with chronic heart failure (pep-chf) study. *Eur Heart J.* 2006;27:2338-2345

13. Little WC, Zile MR, Klein A, Appleton CP, Kitzman DW, Wesley-Farrington DJ. Effect of losartan and hydrochlorothiazide on exercise tolerance in exertional hypertension and left ventricular diastolic dysfunction. *Am J Cardiol.* 2006;98:383-385
14. Massie BM, Carson PE, McMurray JJ, Komajda M, McKelvie R, Zile MR, Anderson S, Donovan M, Iverson E, Staiger C, Ptaszynska A. Irbesartan in patients with heart failure and preserved ejection fraction. *N Engl J Med.* 2008;359:2456-2467
15. Yip GWK, Wang M, Wang T, Chan S, Fung JWH, Yeung L, Yip T, Lau ST, Lau CP, Tang MO, Yu CM, Sanderson J. The hong kong diastolic heart failure study: A randomised controlled trial of diuretics, irbesartan and ramipril on quality of life, exercise capacity, left ventricular global and regional function in heart failure with a normal ejection fraction. *Heart.* 2008;94:573-580
16. Mak GJ, Ledwidge MT, Watson CJ, Phelan DM, Dawkins IR, Murphy NF, Patle AK, Baugh JA, McDonald KM. Natural history of markers of collagen turnover in patients with early diastolic dysfunction and impact of eplerenone. *J Am Coll Cardiol.* 2009;54:1674-1682
17. Parthasarathy HK, Pieske B, Weisskopf M, Andrews CD, Brunel P, Struthers AD, MacDonald TM. A randomized, double-blind, placebo-controlled study to determine the effects of valsartan on exercise time in patients with symptomatic heart failure with preserved ejection fraction. *Eur J Heart Fail.* 2009;11:980-989
18. Kitzman DW, Hundley WG, Brubaker PH, Morgan TM, Moore JB, Stewart KP, Little WC. A randomized double-blind trial of enalapril in older patients with heart failure and preserved ejection fraction: Effects on exercise tolerance and arterial distensibility. *Circ.* 2010;3:477-485
19. Orozco-Gutierrez JJ, Castillo-Martinez L, Orea-Tejeda A, Vazquez-Diaz O, Valdespino-Trejo A, Narvaez-David R, Keirns-Davis C, Carrasco-Ortiz O, Navarro-Navarro A, Sanchez-Santillan R. Effect of l-arginine or l-citrulline oral supplementation on blood pressure and right ventricular function in heart failure patients with preserved ejection fraction. *Cardiol J.* 2010;17:612-618
20. Deswal A, Richardson P, Bozkurt B, Mann DL. Results of the randomized aldosterone antagonism in heart failure with preserved ejection fraction trial (raam-pef). *J Card Fail.* 2011;17:634-642
21. Conraads VM, Metra M, Kamp O, De Keulenaer GW, Pieske B, Zamorano J, Vardas PE, Bohm M, Dei Cas L. Effects of the long-term administration of nebivolol on the clinical symptoms, exercise capacity, and left ventricular function of patients with diastolic dysfunction: Results of the elandd study. *Eur J Heart Fail.* 2012;14:219-225
22. Solomon SD, Zile M, Pieske B, Voors A, Shah A, Kraigher-Krainer E, Shi V, Bransford T, Takeuchi M, Gong J, Lefkowitz M, Packer M, McMurray JJ. The angiotensin receptor neprilysin inhibitor lcz696 in heart failure with preserved ejection fraction: A phase 2 double-blind randomised controlled trial. *The Lancet.* 2012;380:1387-1395
23. Cocco G, Jerie P. Comparison between ivabradine and low-dose digoxin in the therapy of diastolic heart failure with preserved left ventricular systolic function. *Clin.* 2013;3:e29

24. Edelmann F, Wachter R, Schmidt AG, Kraigher-Krainer E, Colantonio C, Kamke W, Duvinage A, Stahrenberg R, Durstewitz K, Loffler M, Dungen HD, Tschope C, Herrmann-Lingen C, Halle M, Hasenfuss G, Gelbrich G, Pieske B. Effect of spironolactone on diastolic function and exercise capacity in patients with heart failure with preserved ejection fraction: The ald-dhf randomized controlled trial. *JAMA - Journal of the American Medical Association*. 2013;309:781-791
25. Kosmala W, Holland DJ, Rojek A, Wright L, Przewlocka-Kosmala M, Marwick TH. Effect of if-channel inhibition on hemodynamic status and exercise tolerance in heart failure with preserved ejection fraction: A randomized trial. *J Am Coll Cardiol*. 2013;62:1330-1338
26. Maier LS, Layug B, Karwatowska-Prokopczuk E, Belardinelli L, Lee S, Sander J, Lang C, Wachter R, Edelmann F, Hasenfuss G, Jacobshagen C. Ranolazine for the treatment of diastolic heart failure in patients with preserved ejection fraction: The rali-dhf proof-of-concept study. *JACC Heart Fail*. 2013;1:115-122
27. Redfield MM, Chen HH, Borlaug BA, Semigran MJ, Lee KL, Lewis G, LeWinter MM, Rouleau JL, Bull DA, Mann DL, Deswal A, Stevenson LW, Givertz Elizabeth OOMM, O'Connor CM, Felker GM, Goldsmith SR, Bart BA, McNulty SE, Ibarra JC, Lin G, Oh JK, Patel MR, Kim RJ, Tracy RP, Velazquez EJ, Anstrom KJ, Hernandez AF, Mascette AM, Braunwald E. Effect of phosphodiesterase-5 inhibition on exercise capacity and clinical status in heart failure with preserved ejection fraction: A randomized clinical trial. *JAMA - Journal of the American Medical Association*. 2013;309:1268-1277
28. Yamamoto K, Origasa H, Hori M, Investigators JD. Effects of carvedilol on heart failure with preserved ejection fraction: The japanese diastolic heart failure study (j-dhf). *Eur J Heart Fail*. 2013;15:110-118
29. Kurrelmeyer KM, Ashton Y, Xu J, Nagueh SF, Torre-Amione G, Deswal A. Effects of spironolactone treatment in elderly women with heart failure and preserved left ventricular ejection fraction. *J Card Fail*. 2014;20:560-568
30. Pitt B, Pfeffer MA, Assmann SF, Boineau R, Anand IS, Claggett B, Clausell N, Desai AS, Diaz R, Fleg JL, Gordeev I, Harty B, Heitner JF, Kenwood CT, Lewis EF, O'Meara E, Probstfield JL, Shaburishvili T, Shah SJ, Solomon SD, Sweitzer NK, Yang S, McKinlay SM, Investigators T. Spironolactone for heart failure with preserved ejection fraction. *N Engl J Med*. 2014;370:1383-1392
31. Van Tassell BW, Arena R, Biondi-Zoccai G, McNair Canada J, Oddi C, Abouzaki NA, Jahangiri A, Falcao RA, Kontos MC, Shah KB, Voelkel NF, Dinarello CA, Abbate A. Effects of interleukin-1 blockade with anakinra on aerobic exercise capacity in patients with heart failure and preserved ejection fraction (from the d-hart pilot study). *Am J Cardiol*. 2014;113:321-327
32. Zile MR, Bourge RC, Redfield MM, Zhou D, Baicu CF, Little WC. Randomized, double-blind, placebo-controlled study of sitaxsentan to improve impaired exercise tolerance in patients with heart failure and a preserved ejection fraction. *Jacc*. 2014;Heart failure. 2:123-130
33. Redfield MM, Anstrom KJ, Levine JA, Koepp GA, Borlaug BA, Chen HH, LeWinter MM, Joseph SM, Shah SJ, Semigran MJ, Felker GM, Cole RT,



Reeves GR, Tedford RJ, Tang WH, McNulty SE, Velazquez EJ, Shah MR, Braunwald E. Isosorbide mononitrate in heart failure with preserved ejection fraction. *N Engl J Med.* 2015
